# Supplementary material for: Stimuli-Responsive Nucleotide–Amino Acid Hybrid Supramolecular Hydrogels
Source: MDPI journal article supplement (doi:10.3390/gels7030146), 2021-09-17
Supplement: s1 [file s1]

# Stimuli-Responsive Nucleotide–Amino Acid Hybrid Supramolecular Hydrogels

Matthew Mulvee <sup>1,2</sup>, Natasa Vasiljevic <sup>2,3</sup>, Stephen Mann <sup>1,2,\*</sup> and Avinash J Patil <sup>1,\*</sup>

<sup>1</sup> Centre for Organized Matter Chemistry, School of Chemistry, University of Bristol, Bristol BS8 1TS, UK; mattmulvee@gmail.com

<sup>2</sup> Bristol Centre for Functional Nanomaterials, University of Bristol, Tyndall Avenue, Bristol BS8 1TL, UK; n.vasiljevic@bristol.ac.uk

<sup>3</sup> School of Physics, University of Bristol, Bristol BS8 1TS, UK

\* Correspondence: S.Mann@bristol.ac.uk (S.M.); Avinash.Patil@bristol.ac.uk (A.J.P.)

## Characterization Methods

Differential scanning calorimetry (DSC) was carried out using a Mettler Toledo TGA/DSC1 Star System at a scan rate of 1 °C min<sup>-1</sup> with a nitrogen flow of 25 mL min<sup>-1</sup>. Rheometry was performed using a Malvern Kinexus fitted with a parallel plate geometry (gap width of 200 µm) at room temperature. Before rheology experiments, all hydrogel samples were aged for one day and were added to the rheometer using a spatula to minimise shear. The top plate is lowered, and the normal force is measured and allowed to reach equilibrium. Transmission electron microscopy (TEM) was performed in bright-field mode using a JEOL TEM 1400 electron microscope and JEOL TEM 2010 electron microscope operating at 120 keV. TEM samples were prepared by drop casting a dilute suspension of hydrogel (5 µL) onto carbon-coated copper TEM grids for three minutes and wicking excess fluid away using filter paper. All samples were left to dry overnight at room temperature. Cryo-TEM samples were imaged using an FEI Tecnai Twin Lens electron microscope fitted with an FEI Eagle 4 k × 4 k CCD camera and was operated at 200 keV. Attenuated total reflectance Fourier transform infrared spectroscopy (ATR-FTIR) was performed using a PerkinElmer Spectrum 100 FTIR spectrometer fitted with a universal attenuated total reflection accessory. The hydrogels were lyophilized by freezing in liquid nitrogen followed by freeze-drying for at least 24 h. CD spectra were recorded at room temperature using a JASCO J810 spectrometer through the two quartz plates. Samples were prepared by spreading hydrogels (ca. 25 µL) between two quartz plates to produce a homogeneous film and to reduce the scattering of light by the hydrogel samples. Experiments were conducted at a scan speed of 20 nm min<sup>-1</sup> with ten accumulations.

## Supplementary Figures

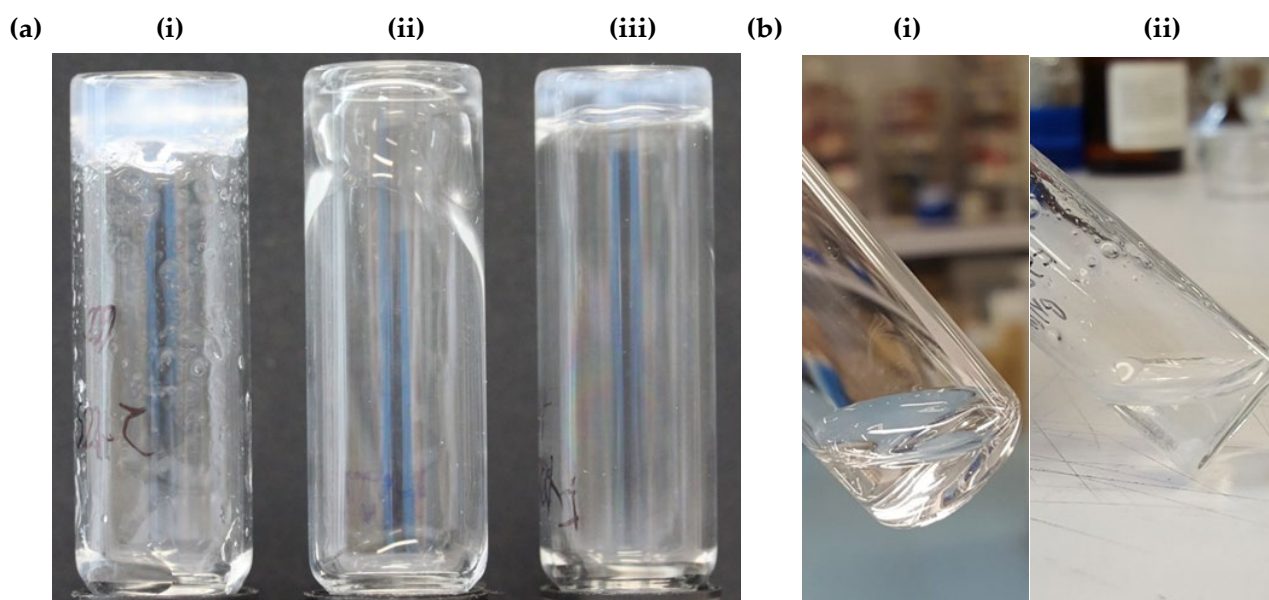

**Figure S1.** (a) Photographs of single component hydrogel samples; nucleotide hydrogel (i) 2:1 Ag:GMP, (ii) 1:1 Ag:GMP, and amino acid derivative FY gel (iii). (b) Photographs demonstrating that no gelation occurs unless all three components are present. (i) mixture of FY-GMP solution shows no gelation occurs without the addition of silver and (ii) no gelation upon the addition of silver to a FY solution. In this case, some precipitation was observed, possibly complexation between the silver salt and FY.

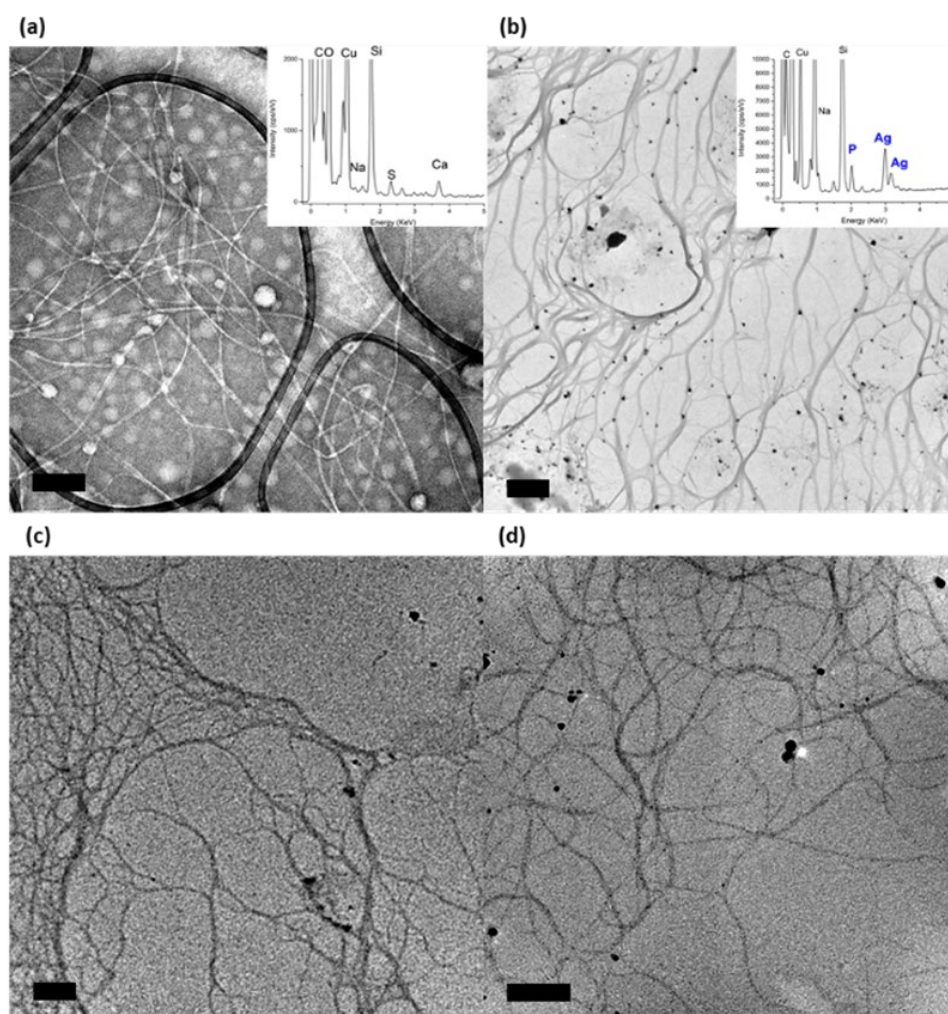

**Figure S2.** TEM images of single component hydrogels (a) FY nanofilaments, inset showing corresponding EDX, (b) negatively stained FY nanofilaments using uranyl acetate, (c) Ag-GMP gels 2:1 ratio, corresponding EDX (inset) showing presence of P and Ag (d) Ag-GMP gels prepared at 1:1 ratio. Scale bars a, c, and d = 100 nm, b = 1  $\mu$ m.

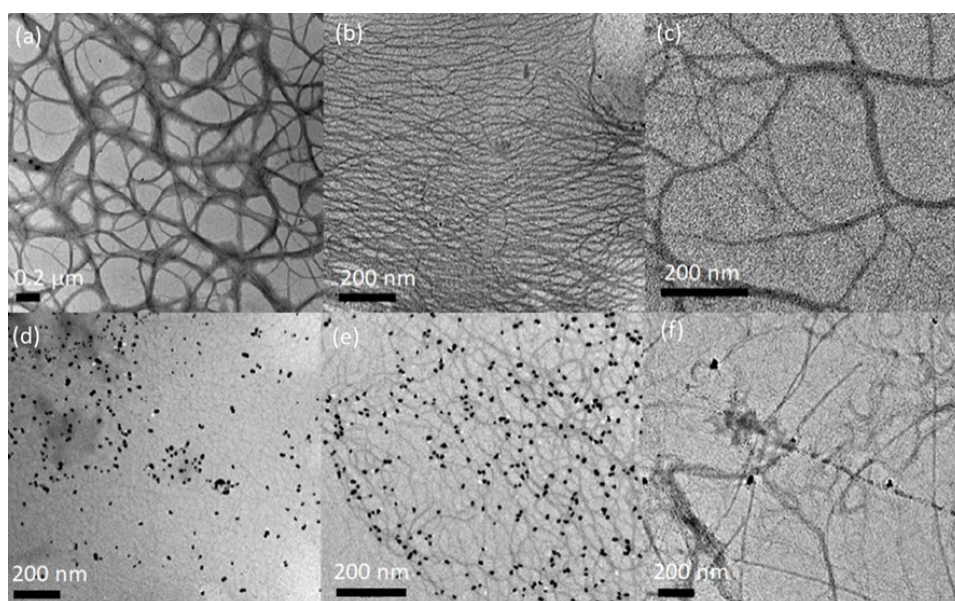

**Figure S3.** TEM images of multicomponent hydrogels samples prepared at 1:1 and 2:1 Ag-GMP stoichiometry and varying molar ratios of GMP and FY, (a) A, (b) B, (c) C, (d) D, (e) E and (f) F.

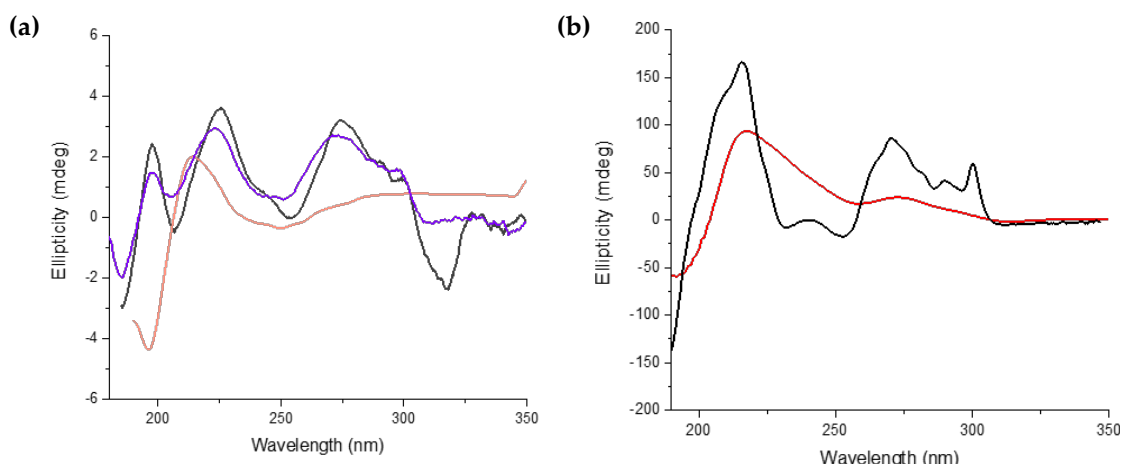

**Figure S4.** CD spectra of (a) FY and GMP gelator solutions and (b) single component gels. (a) FY (grey) and GMP (pink) and FY-GMP (purple). Single component hydrogels: (b) FY gel through hydrolysis of GdL (black) and Ag-GMP gel (red).

### Further FT-IR analysis

The FT-IR spectra of the single-component samples were consistent with previous reports and a detailed analysis is useful to compare to the analysis of the hybrid gels summarised in the main text. Firstly, there are numerous peak shifts associated with the gelation of GMP compared to the GMP powder (Figure S4a,b). Most notably, the carbonyl vibration of the guanine residue shifts sustainably from its conjugated keto form ( $1669\text{ cm}^{-1}$ ) [26,57,58], to a lower wavenumber in its enolate form ( $1606\text{ cm}^{-1}$  and  $1605\text{ cm}^{-1}$ , for ratios 1:1 and 2:1, respectively), in line with previous reports [26,59]. This hypsochromic shift is indicative of a higher energy bond formation, relative to the conjugated keto carbonyl.

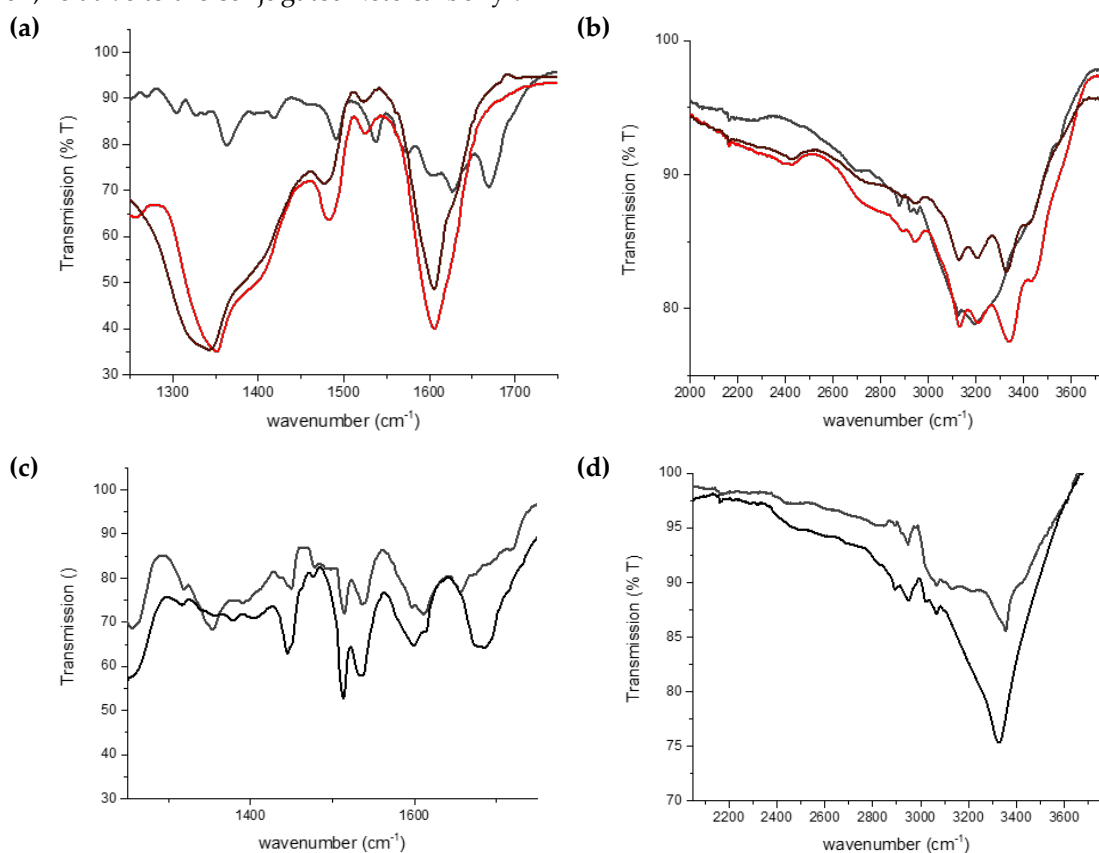

**Figure S5.** FT-IR spectra of (a) Fmoc-tyrosine powder (grey) (b) lyophilised powder of FY hydrogel prepared through hydrolysis of GdL (black), (c) GMP powder and lyophilised powders of Ag-GMP hydrogels; 1-1 (red) and, (d) 2-1 (maroon).

Many of the guanine ring stretches in this region observed in the powder are masked by this strong enol vibration. However, the C=C vibration ( $1537\text{ cm}^{-1}$ ) is slightly shifted to a higher vibration ( $1524\text{ cm}^{-1}$ ), possibly a consequence of disrupting the conjugated  $\pi$ -orbital system of the guanine ring [1]. Also, the  $\text{NH}_2$  scissoring bend peak ( $1491\text{ cm}^{-1}$ ) broadens and shifts to  $1477\text{ cm}^{-1}$  upon gelation, indicative of becoming involved in hydrogen bonding [2,3]. In conjunction with this, at higher wavenumbers, are new peaks are observed at  $3320\text{ cm}^{-1}$  and  $3440\text{ cm}^{-1}$  characteristic of symmetric and asymmetric stretches, respectively, for hydrogen-bonded amine residues.[4] The broad peaks at  $1321$  and  $1341\text{ cm}^{-1}$  for the 2:1 and 1:1 ratio, respectively, are associated with the full dissociated  $\text{NO}_3^-$  stretch, with the shoulder peak due to the vibrational mode for the ionic pair separated by one water molecule [5].

FTIR of **FY** (Figure S4c,d) shows several key differences between the gelled sample and the **FY** powder. These mainly originate from the Amide I regions, associated with carbonyl stretches, Amide II related to N-H bends and Amide A associated with hydrogen-bonded amine and hydroxyl groups. Gelation results in the disappearance of the  $1656\text{ cm}^{-1}$ , associated with disordered or unstacked carbonyl groups [2,6]. This indicates more ordered assembly, which would be expected in the nanofilament formation. Gelation of **FY** is also marked by a slight bathochromic shift in the amide I region for the pendant carbonyl ( $1611\text{ cm}^{-1}$ ) to  $1614\text{ cm}^{-1}$  indicating more extended hydrogen bonding, as would be expected as electrostatic repulsion is lowered through protonation [2,7,8]. A broad non-Gaussian peak also emerges with two minima at  $1675$  and  $1685\text{ cm}^{-1}$  characteristic of the carbamate carbonyl group, indicating that this group becomes involved in the hydrogen-bonding network as a result of gelation [2,6,9]. The former peak is associated with disordered carbamate hydrogen bonding and some disorder is to be expected for such small gelators [2,10,11]. The peak at  $1599\text{ cm}^{-1}$  is the asymmetric stretching of the carboxylate anion indicating a proportion of the terminal carboxylic acid groups remain deprotonated [2,6,12]. Also, associated with gelation is a broad peak at  $3321\text{ cm}^{-1}$  characteristic of hydrogen-bonded hydroxyl groups [13,14].

**Table S1.** Tgel-sol temperatures recorded from DSC thermograms of the single and multicomponent gels.

| Sample     | T <sub>gel-sol</sub> (°C) |
|------------|---------------------------|
| FY         | 40.1                      |
| Ag:GMP 1:1 | 46.8                      |
| Ag:GMP 2:1 | 39.7                      |
| <b>A</b>   | 44.8                      |
| <b>B</b>   | 41.2                      |
| <b>C</b>   | 36.2 and 40.4             |
| <b>D</b>   | 35.5 and 40.2             |
| <b>E</b>   | 42.3 and 44.7             |
| <b>F</b>   | 46.1                      |

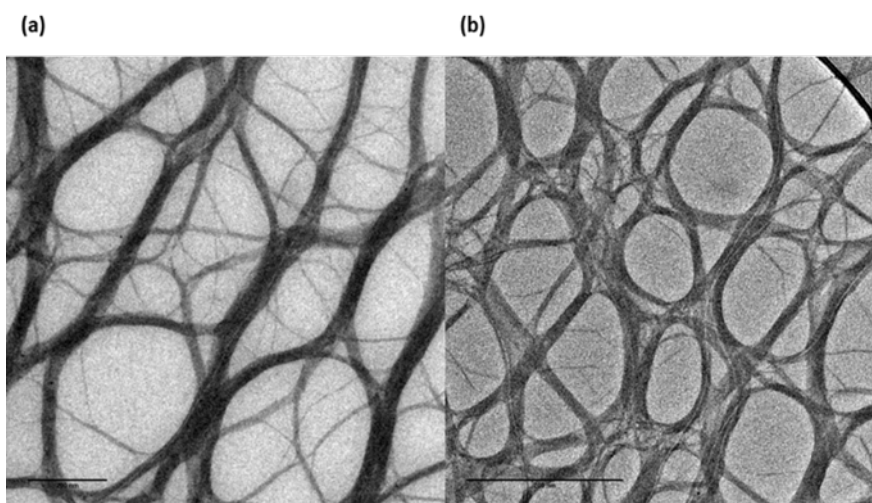

**Figure S6.** Representative TEM images of multicomponent hydrogel (Sample A, composition 1:1 Ag-GMP (25 mM) FY (12.5 mM) after the pH was raised to 8.7, clearly demonstrating that filaments are intact. Scale bars = 200 nm.

## References

1. Tu, T.; Reinos, J.A. The interaction of silver ion with guanosine, guanosine monophosphate, and related compounds. Determination of possible sites of complexing. *Biochemistry* **1966**, *5*, 3375–3383.
2. Fleming, S.; Frederix, P.W.J.M.; Ramos Sasselli, I.; Hunt, N.T.; Ulijn, R.V.; Tuttle, T. Assessing the utility of infrared spectroscopy as structural diagnostic tool for  $\beta$  sheets in self-assembling aromatic peptide amphiphiles. *Langmuir* **2013**, *29*, 9510–9515.
3. Hashemnejad, S.M.; Kundu, S. Probing gelation and rheological behavior of a self-assembled molecular gel. *Langmuir* **2017**, *33*, 7769–7779.
4. Zhizhina, G.P.; Oleinik, E.F. Infrared spectroscopy of nucleic acids. *Russ. Chem. Rev.*, **1972**, *41*, 258–280.
5. De La Fuente, M.; Hernanz, A.; Navarro, R. IR and Raman studies on the interactions of 5'-GMP and 5'-CMP phosphate groups with Mg (II), Ca (II), Sr (II), Ba (II), Cr (II), Co (II), Cu (II), Zn (II), Cd (II), Al (III) and Ga (III). *J. Biol. Inorg. Chem.* **2004**, *9*, 973–986. DOI:10.1007/s00775-004-0593-5.
6. Fleming, S.; Debnath, S.; Frederix, P.W.J.M.; Hunt, N.T.; Ulijn, R.V. Insights into the coassembly of hydrogelators and surfactants based on aromatic peptide amphiphiles. *Biomacromolecules* **2014**, *15*, 1171–1184.
7. Sukul, P.K.; Malik, S. Removal of toxic dyes from aqueous medium using adenine based bicomponent hydrogel. *RSC Adv.* **2013**, *3*, 1902–1915.
8. Baral, A.; Basak, S.; Basu, K.; Dehsorkhi, K.; Hamley, I.W.; Banerjee, A. Time dependent gel to gel transformation of a peptide based supramolecular gelator. *Soft Matter* **2015**, *11*, 4944–4951.
9. Singh, V.; Snigdha, K.; Singh, C.; Sinha, N.; Thakur, A.K. Understanding the self-assembly of Fmoc-phenylalanine to hydrogel. *Soft Matter* **2015**, *11*, 5353–5364.
10. Fleming, S.; Debnath, S.; Frederix, P.W.J.M.; Tuttle, T.; Ulijn, R.V. Aromatic peptide amphiphiles: significance of the Fmoc moiety. *Chem. Commun. (Camb)*. **2013**, *49*, 10587–10589.
11. Wang, J.; Liu, K.; Xing, R.; Yan, X. Peptide assembly: thermodynamics and kinetics. *Chem. Soc. Rev.*, **2016**, *45*, 5589–5604.
12. Abul-Haija, Y.M.; Roy, S.; Frederix, P.W.J.M.; Javid, N.; Jayawarna, V.; Ulijn, R.V. Biocatalytically triggered co-assembly of two component core-shell nanofibers. *Small* **2014**, *10*, 973–979.
13. Metreveli, N.O.; Jariashvili, K.K.; Namicheishvili, L.O.; Svintradze, D.V.; Chikvaidze, E.N.; Sionkowska, A.; Skopinska, J. Uv-vis and FTIR spectra of ultraviolet irradiated collagen in the presence of antioxidant ascorbic acid. *Ecotoxicol. Environ. Saf.* **2009**, *73*, 448–455.
14. Gerothanassis, P.; Birlirakis, N.; Sakarellos, C.; Marraud, M. Solvation state of the Tyr side chain in peptides. An FTIR and  $^{17}\text{O}$  NMR approach. *J. Am. Chem. Soc.* **1992**, *114*, 9043–9047.
